# Supplementary material for: Maize network analysis revealed gene modules involved in development, nutrients utilization, metabolism, and stress response
Source: PubMed Central journal article supplement (PMC5540570; doi:10.1186/s12870-017-1077-4), 2017-08-01
Supplement: 12870_2017_1077_MOESM6_ESM.pdf [file 12870_2017_1077_MOESM6_ESM.pdf]

Legend : Log<sub>2</sub> Expression Value

# Figure S3

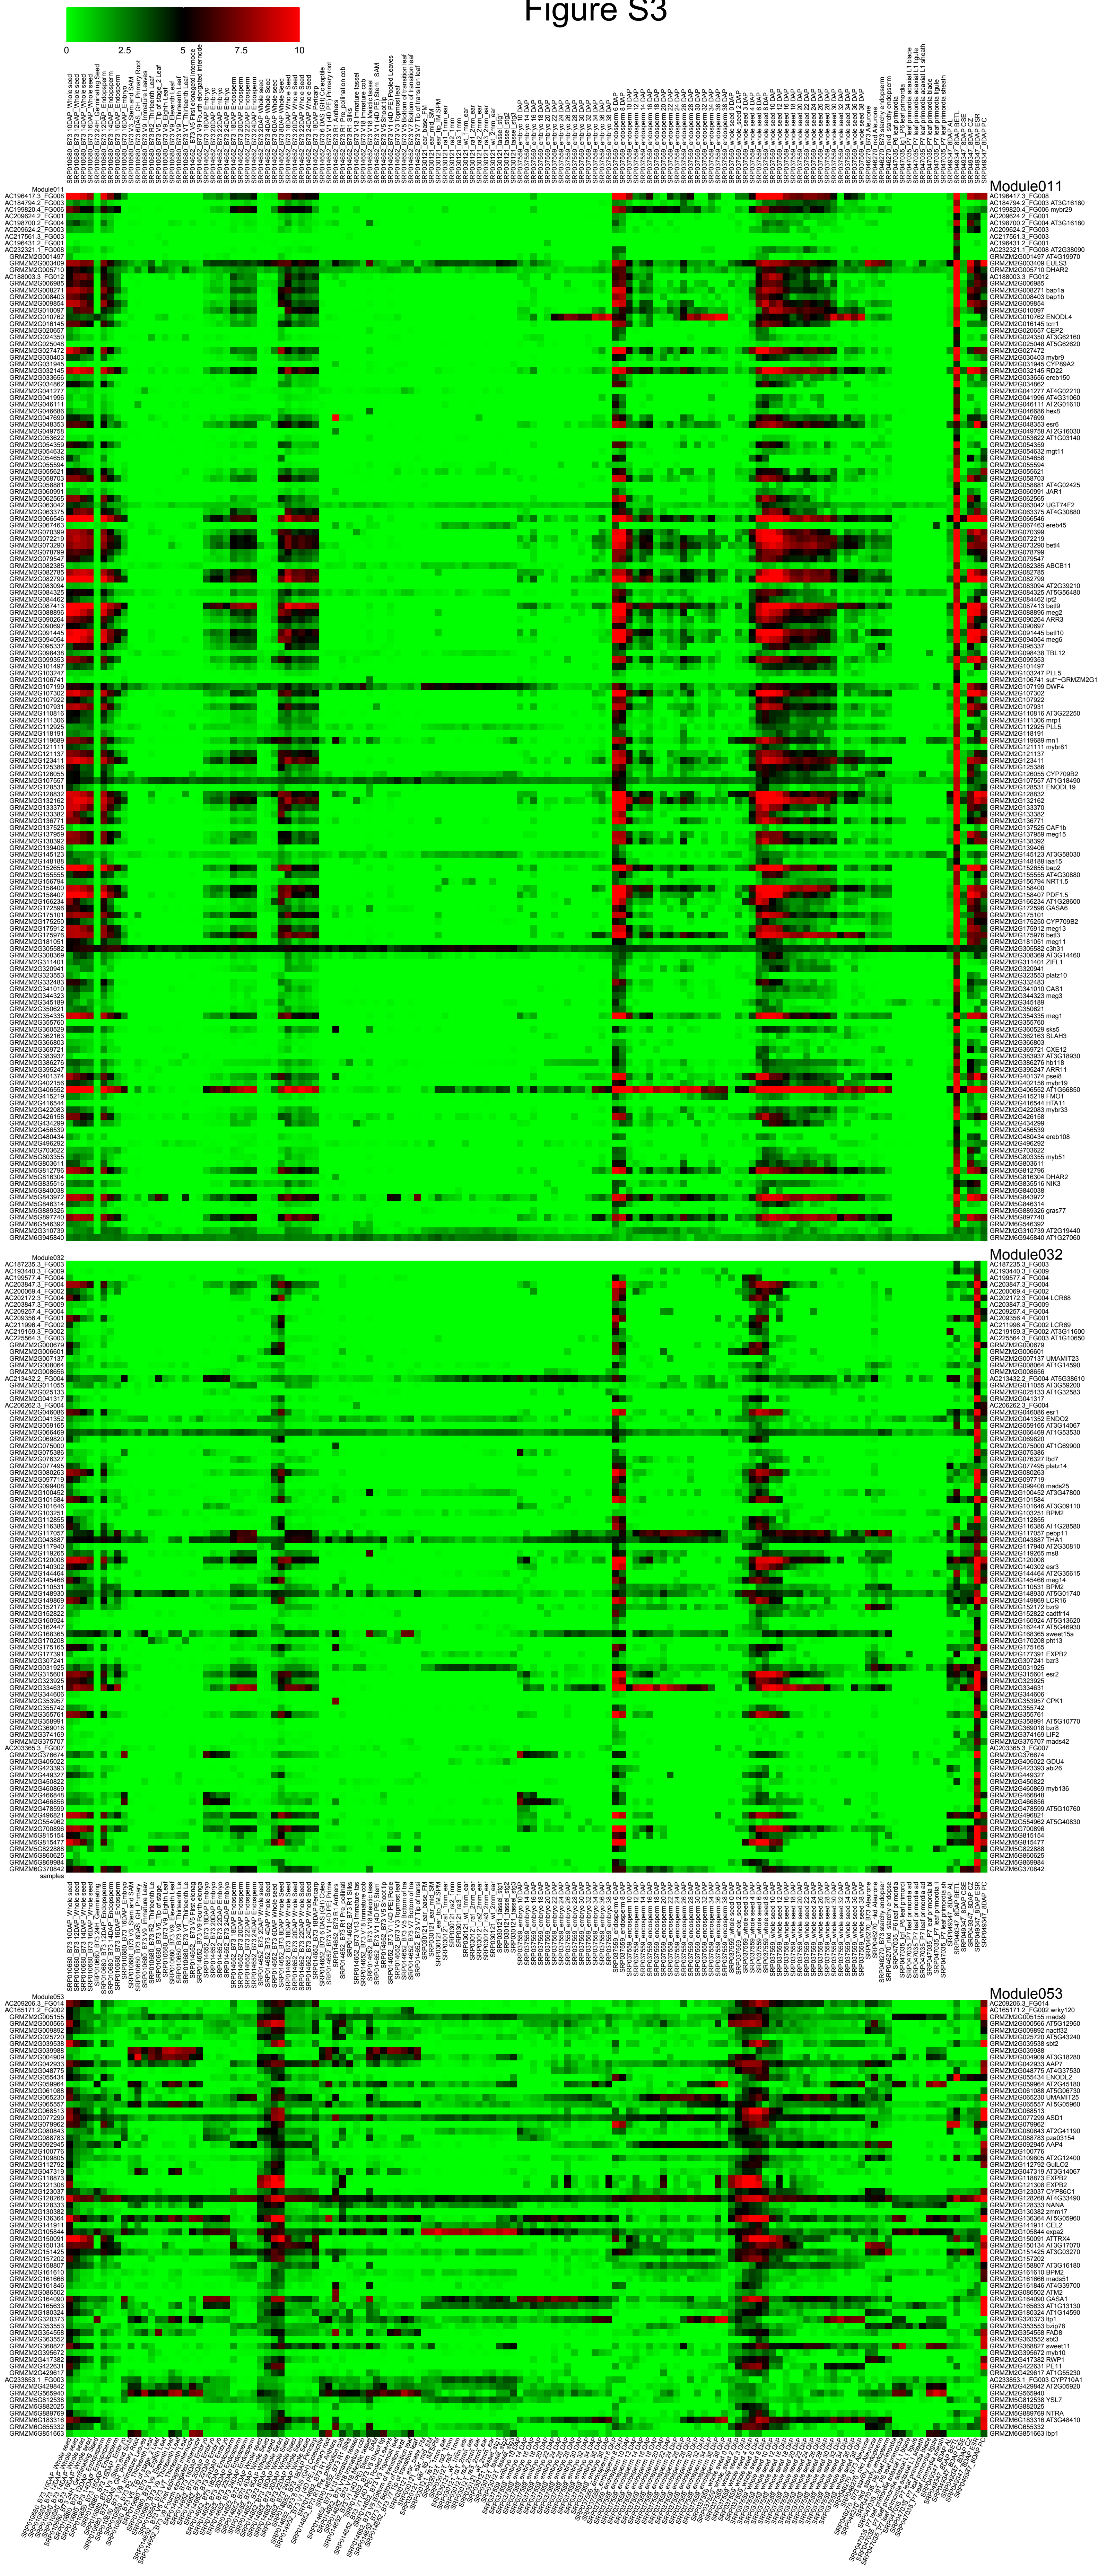

## Module011

AC196417.3\_FG008  
AC196820.4\_FG006  
AC209624.2\_FG001  
AC198703.3\_FG003  
AC209624.2\_FG003  
AC217981.3\_FG003  
AC198451.2\_FG001  
AC232321.1\_FG008  
GRMZM2G003409  
GRMZM2G005710  
AC189003.3\_FG012  
GRMZM2G006985  
GRMZM2G0080271  
GRMZM2G0080443  
GRMZM2G009884  
GRMZM2G010037  
GRMZM2G010762  
GRMZM2G016145  
GRMZM2G0204350  
GRMZM2G0205948  
GRMZM2G027472  
GRMZM2G030403  
GRMZM2G031945  
GRMZM2G032145  
GRMZM2G041277  
GRMZM2G041996  
GRMZM2G0468111  
GRMZM2G046686  
GRMZM2G048353  
GRMZM2G049758  
GRMZM2G053622  
GRMZM2G054359  
GRMZM2G054658  
GRMZM2G055594  
GRMZM2G058703  
GRMZM2G058881  
GRMZM2G060991  
GRMZM2G062565  
GRMZM2G063375  
GRMZM2G068546  
GRMZM2G070399  
GRMZM2G072119  
GRMZM2G073290  
GRMZM2G078799  
GRMZM2G079847  
GRMZM2G082385  
GRMZM2G082705  
GRMZM2G082799  
GRMZM2G083094  
GRMZM2G083255  
GRMZM2G084462  
GRMZM2G087413  
GRMZM2G088936  
GRMZM2G090284  
GRMZM2G090697  
GRMZM2G091445  
GRMZM2G094054  
GRMZM2G095337  
GRMZM2G098438  
GRMZM2G099353  
GRMZM2G101497  
GRMZM2G103247  
GRMZM2G106174  
GRMZM2G107199  
GRMZM2G107302  
GRMZM2G107622  
GRMZM2G107931  
GRMZM2G110816  
GRMZM2G111306  
GRMZM2G112925  
GRMZM2G118191  
GRMZM2G119689  
GRMZM2G121111  
GRMZM2G121137  
GRMZM2G123411  
GRMZM2G125388  
GRMZM2G126055  
GRMZM2G107657  
GRMZM2G128331  
GRMZM2G128832  
GRMZM2G132462  
GRMZM2G133370  
GRMZM2G133382  
GRMZM2G138771  
GRMZM2G137525  
GRMZM2G137959  
GRMZM2G138392  
GRMZM2G139406  
GRMZM2G145123  
GRMZM2G148188  
GRMZM2G152655  
GRMZM2G155655  
GRMZM2G156794  
GRMZM2G158400  
GRMZM2G158407  
GRMZM2G166234  
GRMZM2G172598  
GRMZM2G175101  
GRMZM2G175260  
GRMZM2G175912  
GRMZM2G175976  
GRMZM2G181051  
GRMZM2G308582  
GRMZM2G308369  
GRMZM2G311403  
GRMZM2G320941  
GRMZM2G323553  
GRMZM2G333483  
GRMZM2G341010  
GRMZM2G344323  
GRMZM2G345189  
GRMZM2G355621  
GRMZM2G355760  
GRMZM2G360529  
GRMZM2G362163  
GRMZM2G366903  
GRMZM2G369721  
GRMZM2G383937  
GRMZM2G386276  
GRMZM2G395047  
GRMZM2G401374  
GRMZM2G402156  
GRMZM2G406293  
GRMZM2G415219  
GRMZM2G416544  
GRMZM2G422083  
GRMZM2G426158  
GRMZM2G434299  
GRMZM2G456539  
GRMZM2G480434  
GRMZM2G496292  
GRMZM2G703622  
GRMZM2G803355  
GRMZM2G803611  
GRMZM2G812796  
GRMZM2G816034  
GRMZM2G835516  
GRMZM2G840308  
GRMZM2G843972  
GRMZM2G848514  
GRMZM2G859326  
GRMZM2G897740  
GRMZM2G946932  
GRMZM2G910739  
GRMZM2G945840

## Module032

AC187235.3\_FG003  
AC193440.3\_FG009  
AC198577.4\_FG004  
AC203847.3\_FG004  
AC200699.4\_FG002  
AC201172.3\_FG004  
AC203847.3\_FG009  
AC209297.4\_FG004  
AC209366.4\_FG001  
AC211996.4\_FG002  
AC219159.3\_FG002  
AC225564.3\_FG003  
GRMZM2G000679  
GRMZM2G007137  
GRMZM2G008621  
GRMZM2G008656  
AC213432.2\_FG004  
GRMZM2G025133  
GRMZM2G041317  
AC209292.3\_FG004  
GRMZM2G046086  
GRMZM2G041352  
GRMZM2G059165  
GRMZM2G066469  
GRMZM2G075000  
GRMZM2G075396  
GRMZM2G076327  
GRMZM2G077495  
GRMZM2G080253  
GRMZM2G097719  
GRMZM2G099408  
GRMZM2G110452  
GRMZM2G101584  
GRMZM2G101546  
GRMZM2G103251  
GRMZM2G112855  
GRMZM2G116396  
GRMZM2G117057  
GRMZM2G043687  
GRMZM2G119402  
GRMZM2G119265  
GRMZM2G120208  
GRMZM2G140302  
GRMZM2G144464  
GRMZM2G145466  
GRMZM2G110531  
GRMZM2G148930  
GRMZM2G152172  
GRMZM2G152923  
GRMZM2G160924  
GRMZM2G162447  
GRMZM2G168365  
GRMZM2G170298  
GRMZM2G175693  
GRMZM2G177391  
GRMZM2G307241  
GRMZM2G315601  
GRMZM2G323925  
GRMZM2G334606  
GRMZM2G335957  
GRMZM2G355742  
GRMZM2G355761  
GRMZM2G369018  
GRMZM2G374168  
GRMZM2G375707  
AC203365.3\_FG007  
GRMZM2G405022  
GRMZM2G423393  
GRMZM2G449327  
GRMZM2G450822  
GRMZM2G460969  
GRMZM2G466848  
GRMZM2G466856  
GRMZM2G478590  
GRMZM2G496821  
GRMZM2G554662  
GRMZM2G709896  
GRMZM2G815154  
GRMZM2G822888  
GRMZM2G860625  
GRMZM2G869994  
GRMZM2G873042

## Module053

AC209208.3\_FG014  
AC165171.2\_FG002  
GRMZM2G000155  
GRMZM2G009892  
GRMZM2G025720  
GRMZM2G039538  
GRMZM2G039988  
GRMZM2G0404909  
GRMZM2G042933  
GRMZM2G043478  
GRMZM2G055434  
GRMZM2G059964  
GRMZM2G081988  
GRMZM2G085230  
GRMZM2G085557  
GRMZM2G085613  
GRMZM2G077299  
GRMZM2G080253  
GRMZM2G080843  
GRMZM2G088783  
GRMZM2G111740  
GRMZM2G100776  
GRMZM2G109823  
GRMZM2G112792  
GRMZM2G047319  
GRMZM2G118873  
GRMZM2G121308  
GRMZM2G123037  
GRMZM2G128268  
GRMZM2G128333  
GRMZM2G136364  
GRMZM2G141911  
GRMZM2G105849  
GRMZM2G150091  
GRMZM2G150194  
GRMZM2G151124  
GRMZM2G157202  
GRMZM2G158818  
GRMZM2G161610  
GRMZM2G161666  
GRMZM2G161846  
GRMZM2G088602  
GRMZM2G184929  
GRMZM2G166633  
GRMZM2G180324  
GRMZM2G200323  
GRMZM2G353553  
GRMZM2G354558  
GRMZM2G388827  
GRMZM2G398972  
GRMZM2G417382  
GRMZM2G422631  
GRMZM2G429817  
AC233853.1\_FG003  
GRMZM2G289442  
GRMZM2G289494  
GRMZM2G281258  
GRMZM2G880929  
GRMZM2G889769  
GRMZM2G183316  
GRMZM2G855332  
GRMZM2G851663

## Module055

AC209208.3\_FG014  
AC165171.2\_FG002  
GRMZM2G000155  
GRMZM2G009892  
GRMZM2G025720  
GRMZM2G039538  
GRMZM2G039988  
GRMZM2G0404909  
GRMZM2G042933  
GRMZM2G043478  
GRMZM2G055434  
GRMZM2G059964  
GRMZM2G081988  
GRMZM2G085230  
GRMZM2G085557  
GRMZM2G085613  
GRMZM2G077299  
GRMZM2G080253  
GRMZM2G080843  
GRMZM2G088783  
GRMZM2G111740  
GRMZM2G100776  
GRMZM2G109823  
GRMZM2G112792  
GRMZM2G047319  
GRMZM2G118873  
GRMZM2G121308  
GRMZM2G123037  
GRMZM2G128268  
GRMZM2G128333  
GRMZM2G136364  
GRMZM2G141911  
GRMZM2G105849  
GRMZM2G150091  
GRMZM2G150194  
GRMZM2G151124  
GRMZM2G157202  
GRMZM2G158818  
GRMZM2G161610  
GRMZM2G161666  
GRMZM2G161846  
GRMZM2G088602  
GRMZM2G184929  
GRMZM2G166633  
GRMZM2G180324  
GRMZM2G200323  
GRMZM2G353553  
GRMZM2G354558  
GRMZM2G388827  
GRMZM2G398972  
GRMZM2G417382  
GRMZM2G422631  
GRMZM2G429817  
AC233853.1\_FG003  
GRMZM2G289442  
GRMZM2G289494  
GRMZM2G281258  
GRMZM2G880929  
GRMZM2G889769  
GRMZM2G183316  
GRMZM2G855332  
GRMZM2G851663
