# Supplementary material for: Maize network analysis revealed gene modules involved in development, nutrients utilization, metabolism, and stress response
Source: PubMed Central journal article supplement (PMC5540570; doi:10.1186/s12870-017-1077-4), 2017-08-01

# Figure S5

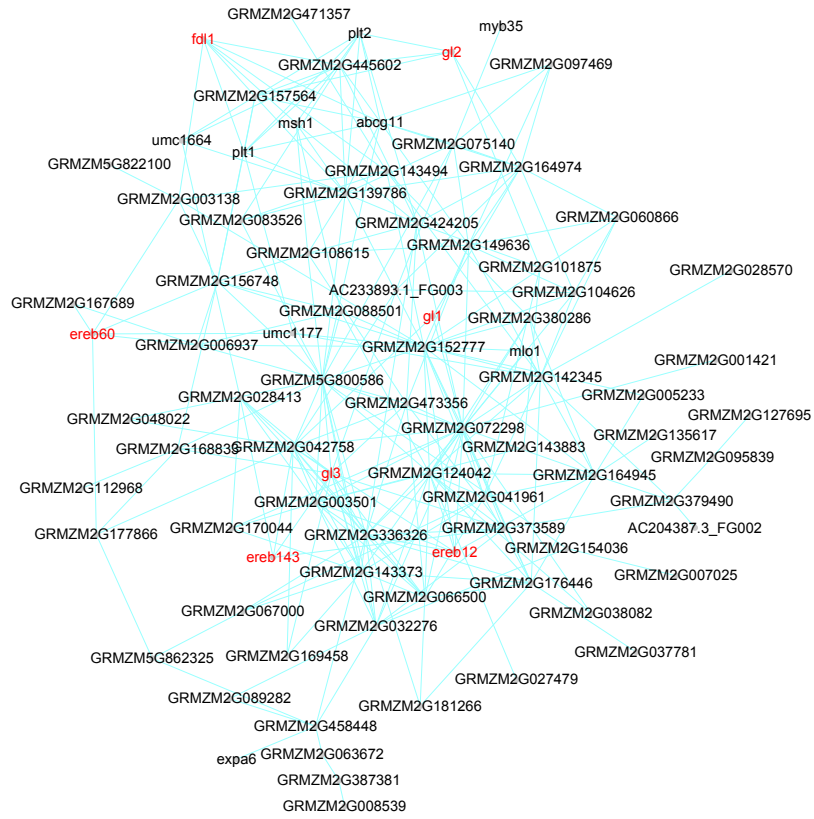

# Figure S6

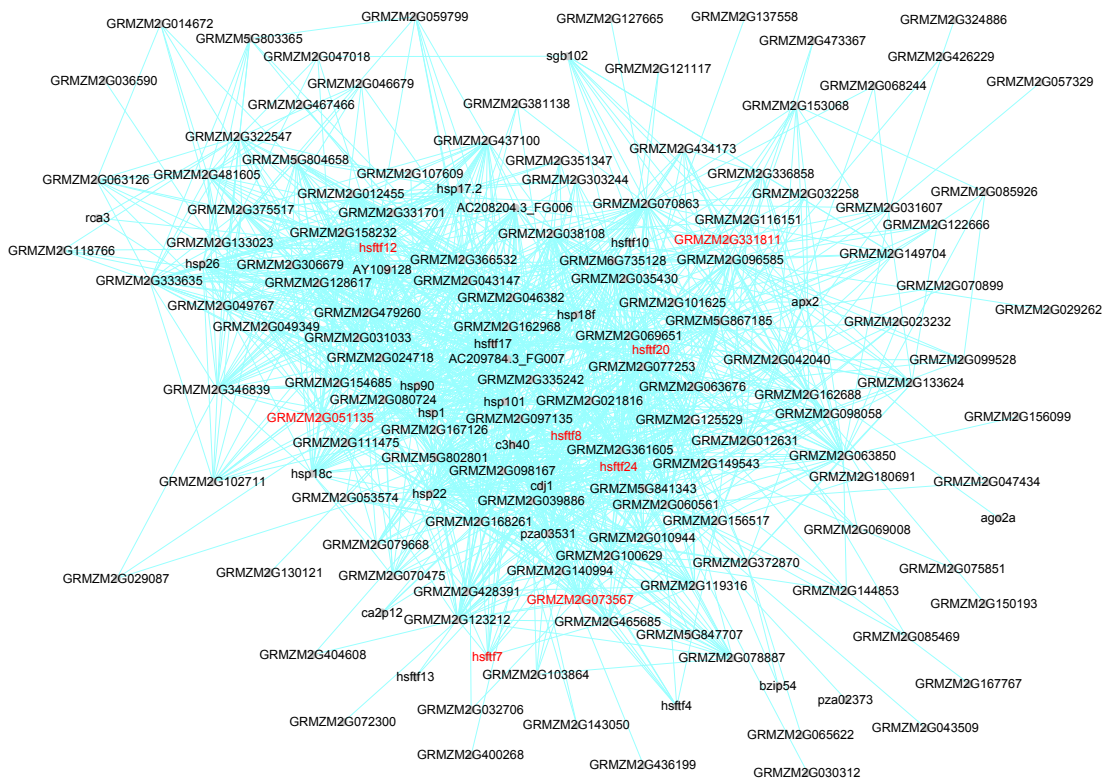

# Figure S7

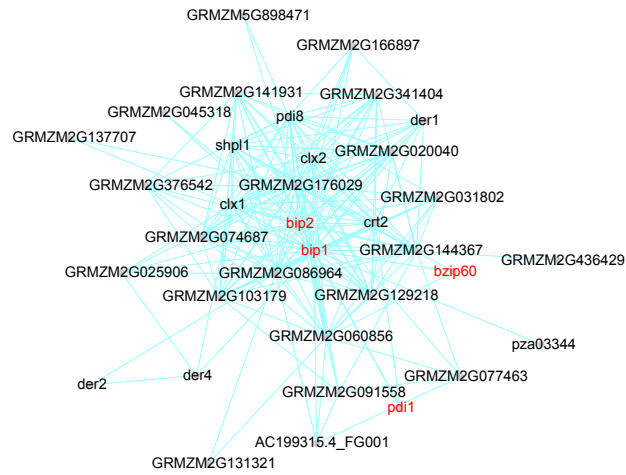

# Figure S8

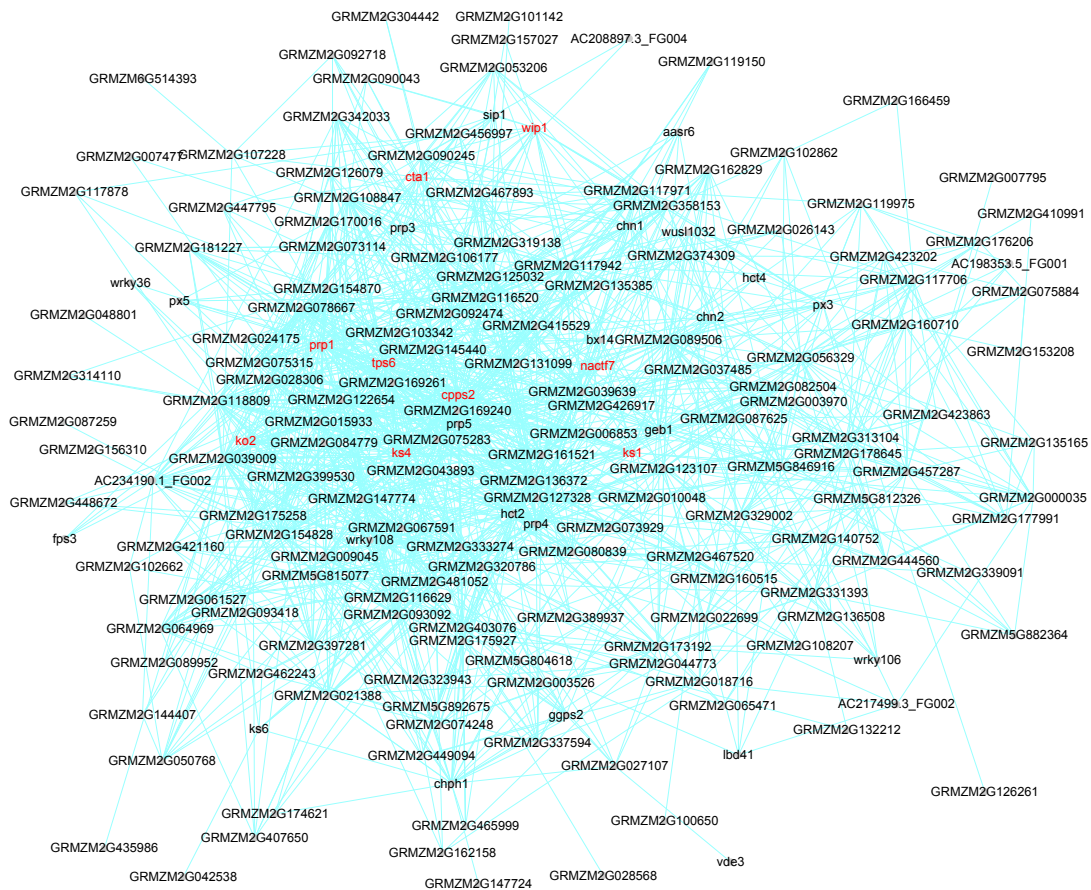

# Figure S9

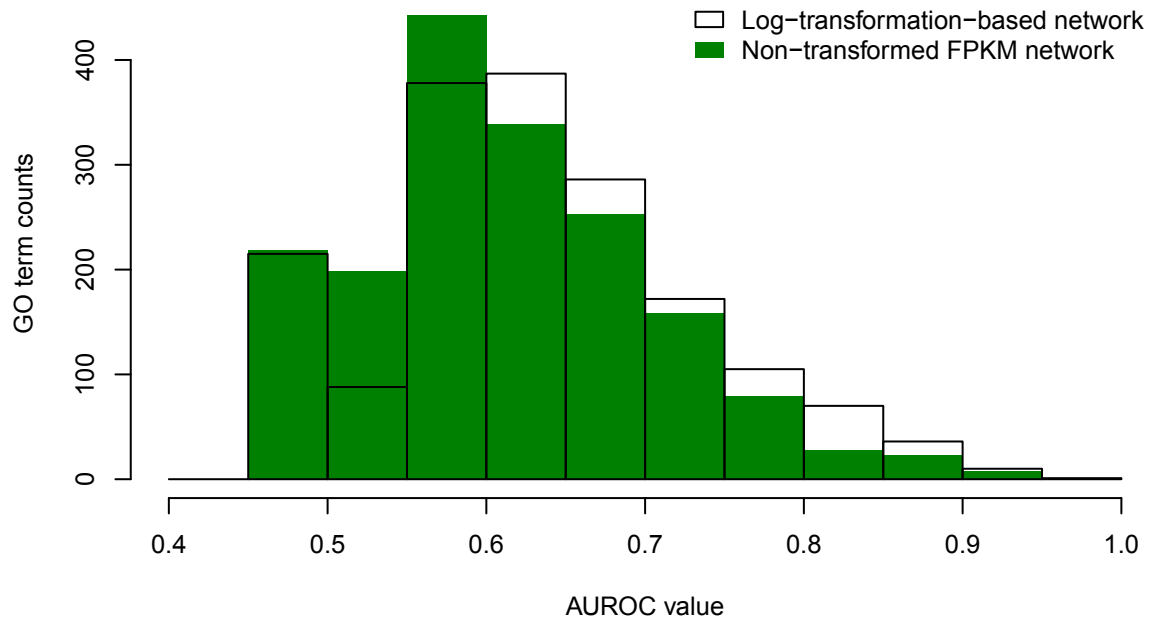

Supplement: 12870_2017_1077_MOESM8_ESM.pdf [file 12870_2017_1077_MOESM8_ESM.pdf]
