# Supplementary material for: Maize network analysis revealed gene modules involved in development, nutrients utilization, metabolism, and stress response
Source: BMC Plant Biol. 2017 Aug 1;17:131. doi: 10.1186/s12870-017-1077-4 (PMC5540570; doi:10.1186/s12870-017-1077-4)
Supplement: Supplementary file 1 — The RNA-Seq studies used in the analysis. Table S4. Selected gene modules identified from the network. Table S5. The percentage of genes with conserved interactions within each module. (XLSX 45 kb) [file 12870_2017_1077_MOESM1_ESM.xlsx]

## Sheet: Table S1
Table S1. The RNA-Seq studies used in the analysis
SRAStudy	Publication (PMID or DOI)	Publication Title	Reference	Sample Description
SRP002265	21037569	The developmental dynamics of the maize leaf transcriptome	Li et al., 2010	Samples from maize leaves
ERP001184	22748054	Identification of genes specifically or preferentially expressed in maize silk reveals similarity and diversity in transcript abundance of different dry stigmas	Xu et al., 2012	Samples from mature silk, mature pollen, mature ovary, 6-days old seedling, silk at 20min after pollination, and silk at 3h after pollination
SRP013491	22822204	A genome-wide regulatory framework identifies maize pericarp color1 controlled genes	Morohashi et al., 2012	Samples from pericarp
SRP013564	22855831	Unraveling the KNOTTED1 regulatory network in maize meristems	Bolduc et al., 2012	Samples from ears (WT, er1), tassels (WT, er1), and leaf (WT, Kn1-N)
SRP015787	23196693	Digital gene expression analysis of early root infection resistance to Sporisorium reilianum f. sp. zeae in maize	Zhang et al., 2013	Roots infected with Sporisorium reilianum f. sp. Zeae and control
SRP014652	doi:10.3835/plantgenome2015.04.0025	An Expanded Maize Gene Expression Atlas based on RNA Sequencing and its Use to Explore Root Development	Stelpflug et al., 2016	Samples from different maize tissues
SRP010680	23637782	Maize gene atlas developed by RNA sequencing and comparative evaluation of transcriptomes based on RNA sequencing and microarrays	Sekhon et al., 2013	Samples from 11 organs
SRP028231	23647263	Genome-wide transcript analysis of early maize leaf development reveals gene cohorts associated with the differentiation of C4 Kranz anatomy	Wang et al., 2013	Samples from Kranz and non-Kranz leaves
SRP022165	24089437	Maize LAZY1 mediates shoot gravitropism and inflorescence development through regulating auxin transport, auxin signaling, and light response	Dong et al., 2013	Samples from WT and lazy1 nodes
SRP030121	24307553	Regulatory modules controlling maize inflorescence architecture	Eveland et al., 2014	Samples from different stages of WT ears, tassels, and ra1, ra2, ra3 ears
SRP033653	24472600	High throughput RNA sequencing of a hybrid maize and its parents shows different mechanisms responsive to nitrogen limitation	Bi et al., 2014	Response to nitrogen starvation
SRP035577	24790109	Developmental dynamics of Kranz cell transcriptional specificity in maize leaf reveals early onset of C4-related processes	Tausta et al., 2014	Samples from bundle sheath and mesophyll cells of different maize leaf sections
ERP004161	24804793	Sequence and ionomic analysis of divergent strains of maize inbred line B73 with an altered growth phenotype	Mascher et al., 2014	Response to phosphate starvation and response to Glomus intraradices
SRP017907	24885405	The transcriptome landscape of early maize meiosis	Dukowic-Schulze et al., 2014	Samples from leptotene and zygotene meiocytes, anthers, and seedlings
SRP026531	24885787	Dehydration stress memory genes of Zea mays; comparison with Arabidopsis thaliana	Ding et al., 2014	Response to drought stress
SRP020528	24902980	Roothairless5, which functions in maize (Zea mays L.) root hair initiation and elongation encodes a monocot-specific NADPH oxidase	Nestler et al., 2014	Samples from WT and roothairless5 roots
SRP040690	25023398	Consistent and heritable alterations of DNA methylation are induced by tissue culture in maize	Stelpflug et al., 2014	Samples from uppermost ear leaf (mRNA-Seq)
SRP037559	25037214	Dynamic transcriptome landscape of maize embryo and endosperm development	Chen et al., 2014	Samples from maize embryo, endosperm, and seed in different development stages
SRP039594	25155950	Functional genomic analysis of constitutive and inducible defense responses to Fusarium verticillioides infection in maize genotypes with contrasting ear rot resistance	Lanubile et al., 2014	Response to Fusarium verticillioides
SRP032921	25174417	Transcriptomic complexity in young maize primary roots in response to low water potentials	Opitz et al., 2014	Response to drought stress in roots
SRP035579	25306245	Comparative analyses of C₄ and C₃ photosynthesis in developing leaves of maize and rice	Wang et al., 2014	Samples from 15 sections of maize leaves
SRP029742	25315323	Nonsyntenic genes drive highly dynamic complementation of gene expression in maize hybrids	Paschold et al., 2014	Samples from stele, cortex, elongation, and meristematic zones of roots
SRP040576	25356773	Whole transcriptome profiling of maize during early somatic embryogenesis reveals altered expression of stress factors and embryogenesis-related genes	Salvo et al., 2014	Samples from immature embryo explants
SRP033422	25465405	The dicer-like1 homolog fuzzy tassel is required for the regulation of meristem determinacy in the inflorescence and vegetative growth in maize	Thompson et al., 2014	Samples from WT and fzt seedlings and tassels (mRNA-Seq)
SRP047420	25465407	Accessible DNA and relative depletion of H3K9me2 at maize loci undergoing RNA-directed DNA methylation	Gent et al., 2014	Samples from mop1-1 developing ear (mRNA-Seq)
SRP047035	25516601	Transcriptomic analyses indicate that maize ligule development recapitulates gene expression patterns that occur during lateral organ initiation	Johnston et al., 2014	Samples from cell/tissue-specific domains of wild-type leaf primordia undergoing ligule initiation, and WT and lg1 leaf primordia
SRP046270	25552497	The naked endosperm genes encode duplicate INDETERMINATE domain transcription factors required for maize endosperm cell patterning and differentiation	Yi et al., 2015	Samples from WT and nkd aleurone and starchy endosperm
SRP041446	25566277	Transcript profiles of maize embryo sacs and preliminary identification of genes involved in the embryo sac-pollen tube interaction	Wang et al., 2014	Samples from embryo sac
SRP041183	25569788	Transposable elements contribute to activation of maize genes in response to abiotic stress	Makarevitch et al., 2015	Response to heat, cold, salt, and UV (mRNA-Seq)
SRP049347	25783031	RNA sequencing of laser-capture microdissected compartments of the maize kernel identifies regulatory modules associated with endosperm cell differentiation	Zhan et al., 2015	Samples from different compartments of maize kernel
SRP035353	25803026	Comparative transcriptome profiling of the maize primary, crown and seminal root in response to salinity stress	Zhang et al., 2015	Response to salt stress in roots
SRP050012	25806518	Genetic and molecular characterization of submergence response identifies Subtol6 as a major submergence tolerance locus in maize	Campbell et al., 2015	Response to submergence
SRP053172	26387805	A transposable element in a NAC gene is associated with drought tolerance in maize seedlings	Mao et al., 2015	Response to drought stress
SRP043224	26484101	RNA-Seq analysis of laser-capture microdissected cells of the developing central starchy endosperm of maize	Thakare et al., 2014	Samples from starchy endosperm
SRP052520	26568274	Ribosome profiling reveals dynamic translational landscape in maize seedlings under drought stress	Lei et al., 2015	Response to drought stress in roots (mRNA-Seq)
SRP006463	10.3835/plantgenome2011.05.0015 (DOI)	Utility of RNA Sequencing for Analysis of Maize Reproductive Transcriptomes	Davidson et al., 2011	Samples from maize reproductive tissue
References:
Bi YM, Meyer A, Downs GS, Shi X, El-Kereamy A, Lukens L, Rothstein SJ (2014) High throughput RNA sequencing of a hybrid maize and its parents shows different mechanisms responsive to nitrogen limitation. BMC Genomics 15: 77
Bolduc N, Yilmaz A, Mejia-Guerra MK, Morohashi K, O'Connor D, Grotewold E, Hake S (2012) Unraveling the KNOTTED1 regulatory network in maize meristems. Genes Dev 26: 1685-1690
Campbell MT, Proctor CA, Dou Y, Schmitz AJ, Phansak P, Kruger GR, Zhang C, Walia H (2015) Genetic and molecular characterization of submergence response identifies Subtol6 as a major submergence tolerance locus in maize. PLoS One 10: e0120385
Chen J, Zeng B, Zhang M, Xie S, Wang G, Hauck A, Lai J (2014) Dynamic transcriptome landscape of maize embryo and endosperm development. Plant Physiol 166: 252-264
Davidson RM, Hansey C, Gowda M, Childs K, Lin H, Vailancourt B, Sekhon R, de Leon N, Kaeppler S, Jiang N, Buell R (2011) Utility of RNA sequencing for analysis of maize reproductive transcriptomes. The Plant Genome 4: 191-203
Ding Y, Virlouvet L, Liu N, Riethoven JJ, Fromm M, Avramova Z (2014) Dehydration stress memory genes of Zea mays; comparison with Arabidopsis thaliana. BMC Plant Biol 14: 141
Dong Z, Jiang C, Chen X, Zhang T, Ding L, Song W, Luo H, Lai J, Chen H, Liu R, Zhang X, Jin W (2013) Maize LAZY1 mediates shoot gravitropism and inflorescence development through regulating auxin transport, auxin signaling, and light response. Plant Physiol 163: 1306-1322
Dukowic-Schulze S, Sundararajan A, Mudge J, Ramaraj T, Farmer AD, Wang M, Sun Q, Pillardy J, Kianian S, Retzel EF, Pawlowski WP, Chen C (2014) The transcriptome landscape of early maize meiosis. BMC Plant Biol 14: 118
Eveland AL, Goldshmidt A, Pautler M, Morohashi K, Liseron-Monfils C, Lewis MW, Kumari S, Hiraga S, Yang F, Unger-Wallace E, Olson A, Hake S, Vollbrecht E, Grotewold E, Ware D, Jackson D (2014) Regulatory modules controlling maize inflorescence architecture. Genome Res 24: 431-443
Gent JI, Madzima TF, Bader R, Kent MR, Zhang X, Stam M, McGinnis KM, Dawe RK (2014) Accessible DNA and relative depletion of H3K9me2 at maize loci undergoing RNA-directed DNA methylation. Plant Cell 26: 4903-4917
Johnston R, Wang M, Sun Q, Sylvester AW, Hake S, Scanlon MJ (2014) Transcriptomic analyses indicate that maize ligule development recapitulates gene expression patterns that occur during lateral organ initiation. Plant Cell 26: 4718-4732
Lanubile A, Ferrarini A, Maschietto V, Delledonne M, Marocco A, Bellin D (2014) Functional genomic analysis of constitutive and inducible defense responses to Fusarium verticillioides infection in maize genotypes with contrasting ear rot resistance. BMC Genomics 15: 710
Lei L, Shi J, Chen J, Zhang M, Sun S, Xie S, Li X, Zeng B, Peng L, Hauck A, Zhao H, Song W, Fan Z, Lai J (2015) Ribosome profiling reveals dynamic translational landscape in maize seedlings under drought stress. Plant J 84: 1206-1218
Li P, Ponnala L, Gandotra N, Wang L, Si Y, Tausta SL, Kebrom TH, Provart N, Patel R, Myers CR, Reidel EJ, Turgeon R, Liu P, Sun Q, Nelson T, Brutnell TP (2010) The developmental dynamics of the maize leaf transcriptome. Nat Genet 42: 1060-1067
Makarevitch I, Waters AJ, West PT, Stitzer M, Hirsch CN, Ross-Ibarra J, Springer NM (2015) Transposable elements contribute to activation of maize genes in response to abiotic stress. PLoS Genet 11: e1004915
Mao H, Wang H, Liu S, Li Z, Yang X, Yan J, Li J, Tran LS, Qin F (2015) A transposable element in a NAC gene is associated with drought tolerance in maize seedlings. Nat Commun 6: 8326
Mascher M, Gerlach N, Gahrtz M, Bucher M, Scholz U, Dresselhaus T (2014) Sequence and ionomic analysis of divergent strains of maize inbred line B73 with an altered growth phenotype. PLoS One 9: e96782
Morohashi K, Casas MI, Falcone Ferreyra ML, Mejia-Guerra MK, Pourcel L, Yilmaz A, Feller A, Carvalho B, Emiliani J, Rodriguez E, Pellegrinet S, McMullen M, Casati P, Grotewold E (2012) A genome-wide regulatory framework identifies maize pericarp color1 controlled genes. Plant Cell 24: 2745-2764
Nestler J, Liu S, Wen TJ, Paschold A, Marcon C, Tang HM, Li D, Li L, Meeley RB, Sakai H, Bruce W, Schnable PS, Hochholdinger F (2014) Roothairless5, which functions in maize (Zea mays L.) root hair initiation and elongation encodes a monocot-specific NADPH oxidase. Plant J 79: 729-740
Opitz N, Paschold A, Marcon C, Malik WA, Lanz C, Piepho HP, Hochholdinger F (2014) Transcriptomic complexity in young maize primary roots in response to low water potentials. BMC Genomics 15: 741
Paschold A, Larson NB, Marcon C, Schnable JC, Yeh CT, Lanz C, Nettleton D, Piepho HP, Schnable PS, Hochholdinger F (2014) Nonsyntenic genes drive highly dynamic complementation of gene expression in maize hybrids. Plant Cell 26: 3939-3948
Salvo SA, Hirsch CN, Buell CR, Kaeppler SM, Kaeppler HF (2014) Whole transcriptome profiling of maize during early somatic embryogenesis reveals altered expression of stress factors and embryogenesis-related genes. PLoS One 9: e111407
Sekhon RS, Briskine R, Hirsch CN, Myers CL, Springer NM, Buell CR, de Leon N, Kaeppler SM (2013) Maize gene atlas developed by RNA sequencing and comparative evaluation of transcriptomes based on RNA sequencing and microarrays. PLoS One 8: e61005
Stelpflug SC, Eichten SR, Hermanson PJ, Springer NM, Kaeppler SM (2014) Consistent and heritable alterations of DNA methylation are induced by tissue culture in maize. Genetics 198: 209-218
Stelpflug SC, Sekhon RS, Vaillancourt B, Hirsch CN, Buell CR, de Leon N, Kaeppler SM (2016) An Expanded Maize Gene Expression Atlas based on RNA Sequencing and its Use to Explore Root Development. The Plant Genome 9
Tausta SL, Li P, Si Y, Gandotra N, Liu P, Sun Q, Brutnell TP, Nelson T (2014) Developmental dynamics of Kranz cell transcriptional specificity in maize leaf reveals early onset of C4-related processes. J Exp Bot 65: 3543-3555
Thakare D, Yang R, Steffen JG, Zhan J, Wang D, Clark RM, Wang X, Yadegari R (2014) RNA-Seq analysis of laser-capture microdissected cells of the developing central starchy endosperm of maize. Genom Data 2: 242-245
Thompson BE, Basham C, Hammond R, Ding Q, Kakrana A, Lee TF, Simon SA, Meeley R, Meyers BC, Hake S (2014) The dicer-like1 homolog fuzzy tassel is required for the regulation of meristem determinacy in the inflorescence and vegetative growth in maize. Plant Cell 26: 4702-4717
Wang L, Czedik-Eysenberg A, Mertz RA, Si Y, Tohge T, Nunes-Nesi A, Arrivault S, Dedow LK, Bryant DW, Zhou W, Xu J, Weissmann S, Studer A, Li P, Zhang C, LaRue T, Shao Y, Ding Z, Sun Q, Patel RV, Turgeon R, Zhu X, Provart NJ, Mockler TC, Fernie AR, Stitt M, Liu P, Brutnell TP (2014) Comparative analyses of C(4) and C(3) photosynthesis in developing leaves of maize and rice. Nat Biotechnol 32: 1158…
Wang P, Kelly S, Fouracre JP, Langdale JA (2013) Genome-wide transcript analysis of early maize leaf development reveals gene cohorts associated with the differentiation of C4 Kranz anatomy. Plant J 75: 656-670
Wang SS, Wang F, Tan SJ, Wang MX, Sui N, Zhang XS (2014) Transcript profiles of maize embryo sacs and preliminary identification of genes involved in the embryo sac-pollen tube interaction. Front Plant Sci 5: 702
Xu XH, Chen H, Sang YL, Wang F, Ma JP, Gao XQ, Zhang XS (2012) Identification of genes specifically or preferentially expressed in maize silk reveals similarity and diversity in transcript abundance of different dry stigmas. BMC Genomics 13: 294
Yi G, Neelakandan AK, Gontarek BC, Vollbrecht E, Becraft PW (2015) The naked endosperm genes encode duplicate INDETERMINATE domain transcription factors required for maize endosperm cell patterning and differentiation. Plant Physiol 167: 443-456
Zhan J, Thakare D, Ma C, Lloyd A, Nixon NM, Arakaki AM, Burnett WJ, Logan KO, Wang D, Wang X, Drews GN, Yadegari R (2015) RNA sequencing of laser-capture microdissected compartments of the maize kernel identifies regulatory modules associated with endosperm cell differentiation. Plant Cell 27: 513-531
Zhang M, Kong X, Xu X, Li C, Tian H, Ding Z (2015) Comparative transcriptome profiling of the maize primary, crown and seminal root in response to salinity stress. PLoS One 10: e0121222
Zhang S, Xiao Y, Zhao J, Wang F, Zheng Y (2013) Digital gene expression analysis of early root infection resistance to Sporisorium reilianum f. sp. zeae in maize. Mol Genet Genomics 288: 21-37

## Sheet: Table S4
	Table S4. Selected gene modules identified from the network.
Selected	Category	Module No.	Number of Genes Within the Module	Percentage of Genes Sharing Conserved Ineractions with Arabidopsis	Module Annotation	Selected Genes from the Module*	Enriched GO Term	pValue
S1	development	11	156	0.0576923	specifically expressed in the basal endosperm transfer layer of endosperm	meg1/meg2/belt3/belt10/mrp1/meg11
S1		32	91	0.032967	specifically expressed in the embryo-surrounding region of endosperm	esr1/esr2/esr3/bzr3/myb136
S1		53	65	0.107692	specifically expressed in the placento-chalazal region of endosperm	sweet11/myb10/mads9
S1.1		3	224	0.00892857	specifically expressed in anthers	myb104/nlp16/dof32
S1.1		17	139	0.158273	specifically expressed in anthers	mgs2/prf2/prf3/limtf6/limtf14	sexual reproduction	1.07925e-19
S1.1		22	124	0.00806452	specifically expressed in anthers	GRMZM2G180071(ANX1)/ GRMZM2G006080(FER)	pectinesterase activity	5.16679e-11
S1.2		18	137	0.10219	specifically expressed in meiotic tassels	ms26/bhlh51/dfr1/myb146/ipe1	sporopollenin biosynthetic process	1.23813e-12
S1.3		30	96	0.0520833	root specific expression	rtcs1/lbd1/nactf24	heme binding	5.20862e-07
S1.3		92	35	0.514286	carpel development	zag1/zmm2/zmm7/zmm8/dlo1/dlo2	carpel development	1.82241e-18
S1.4		76	47	0.319149	Casparian strip development	AC205250.3_FG006(ESB1)/IDP844/GRMZM2G083888(CASP4)	peroxidase activity	8.36585e-09
S1.5		155	20	0.5	epidermal cell differentiation	ocl1/ocl3/ocl4/ocl5a/hb18	epidermal cell differentiation	1.03916e-12
S1.5		13	154	0.285714	secondary cell wall biosynthesis	myb167 /myb109 /nactf1 /cesa12 /myb92 /cesa10	plant-type secondary cell wall biogenesis	2.30826e-16
S1.7		543	7	0.714286	primary cell wall biosynthesis	cesa2 /cesa7 /cesa1 /cesa4	cellulose biosynthetic process	1.78366e-11
S1.7		158	20	0.35	response to auxin	GRMZM2G042429(AT1G29450)/GRMZM2G343360(AT1G29450)	auxin-activated signaling pathway	1.03911e-11
S1.7		183	17	0.294118	response to cytokinins	crr1/crr2/crr4/crr7/lg2	phosphorelay response regulator activity	3.08466e-18
S1.7	nutrients	43	81	0.123457	iron ion homeostasis	nas2/nas10/naat1/GRMZM2G148060(IREG2)/nas1/nas6	transition metal ion transport	1.74218e-10
S1.8		79	45	0.288889	sulfur assimilation	aprl1/aprl2/aps1	sulfate assimilation	2.10072e-11
S2	metabolism	42	82	0.45122	suberin biosynthetic process	hct10/GRMZM2G059637(GPAT5)/GRMZM2G013082(CYP86B1)/GRMZM2G166176(GPAT5)	suberin biosynthetic process	6.18969e-11
S2		61	59	0.237288	trehalose biosynthetic process	trps13 /trps11 /trps15 /trps7 /trps6 /trps10	trehalose biosynthetic process	2.7112e-12
S3		234	14	0.642857	glucose metabolic process	pgm1/pgc3/pgm2/pmg1	glucose metabolic process	1.15949e-12
S3		278	12	0.5	glucan biosynthetic process	gbss1b/sbe3/agp2/ss1	glucan biosynthetic process	1.83901e-08
S3		712	6	0.833333	lignin metabolic process	bm3 /hct5 /cncr1 /bm1	lignin metabolic process	5.41058e-10
S3	stress response	2	237	0.253165	response to chitin	ereb2 /c3h7 /mpk1 /myb50 /wrky92	response to chitin	3.61859e-05
S3		47	72	0.305556	response to oxidative stress	wrky57/GRMZM2G022740(RCI3)/GRMZM2G312997(DOX1)	response to oxidative stress	3.66526e-07
S3
S3	* Shown in parenthesis are the maize genes' homologues in Arabidopsis.
S4
S4

## Sheet: Table S5
Table S5. The percentage of genes with conserved interactions within each module.
Module No.	Number of gene within the module	Number of genes with conserved interactions	Percentage of genes with conserved interactions
1	306	0	0
2	237	60	0.253165
3	224	2	0.00892857
4	190	40	0.210526
5	188	30	0.159574
6	182	65	0.357143
7	170	0	0
8	169	20	0.118343
9	159	38	0.238994
10	157	74	0.471338
11	156	9	0.0576923
12	155	44	0.283871
13	154	44	0.285714
14	151	28	0.18543
15	140	46	0.328571
16	139	18	0.129496
17	139	22	0.158273
18	137	14	0.10219
19	135	23	0.17037
20	130	90	0.692308
21	125	18	0.144
22	124	1	0.00806452
23	117	34	0.290598
24	111	4	0.036036
25	104	28	0.269231
26	103	17	0.165049
27	99	6	0.0606061
28	99	5	0.0505051
29	98	16	0.163265
30	96	5	0.0520833
31	92	3	0.0326087
32	91	3	0.032967
33	91	2	0.021978
34	89	25	0.280899
35	89	17	0.191011
36	88	21	0.238636
37	87	13	0.149425
38	86	14	0.162791
39	85	19	0.223529
40	84	23	0.27381
41	82	1	0.0121951
42	82	37	0.45122
43	81	10	0.123457
44	78	2	0.025641
45	76	10	0.131579
46	73	2	0.0273973
47	72	22	0.305556
48	72	1	0.0138889
49	71	57	0.802817
50	68	11	0.161765
51	67	1	0.0149254
52	66	3	0.0454545
53	65	7	0.107692
54	64	3	0.046875
55	64	2	0.03125
56	63	15	0.238095
57	62	0	0
58	62	9	0.145161
59	60	6	0.1
60	59	26	0.440678
61	59	14	0.237288
62	58	2	0.0344828
63	58	4	0.0689655
64	58	37	0.637931
65	57	17	0.298246
66	55	5	0.0909091
67	55	0	0
68	54	0	0
69	53	16	0.301887
70	52	3	0.0576923
71	51	5	0.0980392
72	51	22	0.431373
73	49	21	0.428571
74	48	0	0
75	47	0	0
76	47	15	0.319149
77	46	11	0.23913
78	46	0	0
79	45	13	0.288889
80	43	3	0.0697674
81	43	6	0.139535
82	43	6	0.139535
83	42	2	0.047619
84	41	5	0.121951
85	41	1	0.0243902
86	40	17	0.425
87	39	2	0.0512821
88	36	4	0.111111
89	35	1	0.0285714
90	35	4	0.114286
91	35	1	0.0285714
92	35	18	0.514286
93	35	0	0
94	35	0	0
95	35	23	0.657143
96	34	4	0.117647
97	33	2	0.0606061
98	33	1	0.030303
99	33	0	0
100	33	5	0.151515
101	32	2	0.0625
102	31	9	0.290323
103	31	1	0.0322581
104	31	5	0.16129
105	31	2	0.0645161
106	31	0	0
107	31	3	0.0967742
108	31	8	0.258065
109	31	0	0
110	30	0	0
111	30	2	0.0666667
112	29	0	0
113	29	0	0
114	28	1	0.0357143
115	28	3	0.107143
116	28	0	0
117	28	0	0
118	27	1	0.037037
119	27	1	0.037037
120	27	0	0
121	27	2	0.0740741
122	27	1	0.037037
123	27	0	0
124	27	1	0.037037
125	27	3	0.111111
126	27	1	0.037037
127	26	3	0.115385
128	26	0	0
129	26	17	0.653846
130	25	0	0
131	25	0	0
132	25	0	0
133	24	0	0
134	24	1	0.0416667
135	24	0	0
136	24	3	0.125
137	23	2	0.0869565
138	23	1	0.0434783
139	23	6	0.26087
140	23	8	0.347826
141	23	1	0.0434783
142	23	0	0
143	22	1	0.0454545
144	22	0	0
145	22	0	0
146	22	1	0.0454545
147	22	0	0
148	22	0	0
149	22	1	0.0454545
150	21	0	0
151	21	4	0.190476
152	21	9	0.428571
153	20	0	0
154	20	6	0.3
155	20	10	0.5
156	20	1	0.05
157	20	0	0
158	20	7	0.35
159	20	0	0
160	20	2	0.1
161	20	1	0.05
162	19	0	0
163	19	0	0
164	19	0	0
165	19	0	0
166	19	0	0
167	19	4	0.210526
168	19	7	0.368421
169	19	1	0.0526316
170	19	2	0.105263
171	19	0	0
172	18	1	0.0555556
173	18	0	0
174	18	0	0
175	18	0	0
176	18	0	0
177	18	1	0.0555556
178	18	0	0
179	18	2	0.111111
180	18	0	0
181	18	0	0
182	18	0	0
183	17	5	0.294118
184	17	0	0
185	17	3	0.176471
186	17	0	0
187	17	0	0
188	17	0	0
189	16	0	0
190	16	0	0
191	16	0	0
192	16	0	0
193	16	2	0.125
194	16	0	0
195	16	0	0
196	16	0	0
197	16	2	0.125
198	16	1	0.0625
199	16	0	0
200	16	0	0
201	16	2	0.125
202	16	1	0.0625
203	16	0	0
204	16	0	0
205	16	0	0
206	16	0	0
207	16	0	0
208	15	0	0
209	15	1	0.0666667
210	15	9	0.6
211	15	0	0
212	15	0	0
213	15	0	0
214	15	0	0
215	15	0	0
216	15	0	0
217	15	0	0
218	15	1	0.0666667
219	15	1	0.0666667
220	15	1	0.0666667
221	15	5	0.333333
222	15	0	0
223	14	0	0
224	14	0	0
225	14	0	0
226	14	0	0
227	14	0	0
228	14	0	0
229	14	0	0
230	14	0	0
231	14	0	0
232	14	0	0
233	14	0	0
234	14	9	0.642857
235	14	0	0
236	14	0	0
237	13	0	0
238	13	0	0
239	13	1	0.0769231
240	13	0	0
241	13	0	0
242	13	0	0
243	13	0	0
244	13	1	0.0769231
245	13	0	0
246	13	0	0
247	13	1	0.0769231
248	13	0	0
249	13	0	0
250	13	0	0
251	13	0	0
252	13	0	0
253	13	0	0
254	13	0	0
255	13	0	0
256	13	0	0
257	13	2	0.153846
258	13	5	0.384615
259	13	0	0
260	13	5	0.384615
261	12	0	0
262	12	0	0
263	12	0	0
264	12	0	0
265	12	0	0
266	12	0	0
267	12	3	0.25
268	12	0	0
269	12	0	0
270	12	0	0
271	12	0	0
272	12	2	0.166667
273	12	1	0.0833333
274	12	2	0.166667
275	12	0	0
276	12	0	0
277	12	0	0
278	12	6	0.5
279	12	0	0
280	12	1	0.0833333
281	12	0	0
282	12	0	0
283	12	0	0
284	12	0	0
285	12	1	0.0833333
286	12	0	0
287	12	0	0
288	12	0	0
289	12	0	0
290	12	0	0
291	12	0	0
292	12	0	0
293	12	0	0
294	12	0	0
295	12	0	0
296	12	2	0.166667
297	12	0	0
298	12	0	0
299	11	0	0
300	11	0	0
301	11	0	0
302	11	0	0
303	11	0	0
304	11	0	0
305	11	0	0
306	11	0	0
307	11	0	0
308	11	9	0.818182
309	11	5	0.454545
310	11	0	0
311	11	1	0.0909091
312	11	1	0.0909091
313	11	0	0
314	11	0	0
315	11	0	0
316	11	0	0
317	11	1	0.0909091
318	11	0	0
319	11	0	0
320	11	2	0.181818
321	11	0	0
322	11	0	0
323	11	0	0
324	11	2	0.181818
325	11	0	0
326	11	0	0
327	11	0	0
328	11	0	0
329	11	0	0
330	11	0	0
331	11	8	0.727273
332	11	0	0
333	11	1	0.0909091
334	11	0	0
335	11	0	0
336	11	0	0
337	11	0	0
338	10	0	0
339	10	0	0
340	10	0	0
341	10	0	0
342	10	2	0.2
343	10	0	0
344	10	0	0
345	10	0	0
346	10	0	0
347	10	0	0
348	10	1	0.1
349	10	0	0
350	10	0	0
351	10	0	0
352	10	1	0.1
353	10	0	0
354	10	0	0
355	10	0	0
356	10	0	0
357	10	1	0.1
358	10	4	0.4
359	10	0	0
360	10	0	0
361	10	0	0
362	10	1	0.1
363	10	0	0
364	10	1	0.1
365	10	0	0
366	10	0	0
367	10	0	0
368	10	0	0
369	10	0	0
370	10	0	0
371	10	0	0
372	10	0	0
373	10	0	0
374	10	0	0
375	10	0	0
376	10	2	0.2
377	10	1	0.1
378	10	0	0
379	10	0	0
380	9	0	0
381	9	0	0
382	9	1	0.111111
383	9	0	0
384	9	4	0.444444
385	9	2	0.222222
386	9	0	0
387	9	0	0
388	9	0	0
389	9	0	0
390	9	1	0.111111
391	9	0	0
392	9	0	0
393	9	0	0
394	9	2	0.222222
395	9	0	0
396	9	0	0
397	9	2	0.222222
398	9	0	0
399	9	0	0
400	9	1	0.111111
401	9	0	0
402	9	0	0
403	9	0	0
404	9	0	0
405	9	0	0
406	9	2	0.222222
407	9	2	0.222222
408	9	0	0
409	9	0	0
410	9	0	0
411	9	3	0.333333
412	9	0	0
413	9	0	0
414	9	0	0
415	9	0	0
416	9	1	0.111111
417	9	0	0
418	9	0	0
419	9	0	0
420	9	0	0
421	9	0	0
422	9	0	0
423	9	0	0
424	9	0	0
425	9	0	0
426	9	0	0
427	9	0	0
428	9	0	0
429	9	1	0.111111
430	9	0	0
431	9	3	0.333333
432	9	0	0
433	9	0	0
434	9	0	0
435	9	0	0
436	9	0	0
437	9	0	0
438	9	0	0
439	9	0	0
440	9	0	0
441	9	0	0
442	9	0	0
443	8	0	0
444	8	3	0.375
445	8	0	0
446	8	0	0
447	8	0	0
448	8	1	0.125
449	8	0	0
450	8	0	0
451	8	1	0.125
452	8	0	0
453	8	0	0
454	8	0	0
455	8	0	0
456	8	0	0
457	8	2	0.25
458	8	0	0
459	8	0	0
460	8	1	0.125
461	8	0	0
462	8	0	0
463	8	0	0
464	8	0	0
465	8	0	0
466	8	0	0
467	8	1	0.125
468	8	0	0
469	8	0	0
470	8	0	0
471	8	0	0
472	8	0	0
473	8	0	0
474	8	0	0
475	8	0	0
476	8	0	0
477	8	0	0
478	8	0	0
479	8	0	0
480	8	0	0
481	8	0	0
482	8	0	0
483	8	1	0.125
484	8	0	0
485	8	0	0
486	8	0	0
487	8	0	0
488	8	0	0
489	8	6	0.75
490	8	0	0
491	8	0	0
492	8	0	0
493	8	0	0
494	8	0	0
495	8	0	0
496	8	0	0
497	8	0	0
498	8	0	0
499	8	0	0
500	8	0	0
501	8	0	0
502	8	0	0
503	8	0	0
504	8	0	0
505	8	0	0
506	8	0	0
507	8	0	0
508	8	0	0
509	8	0	0
510	8	0	0
511	8	0	0
512	8	0	0
513	8	0	0
514	7	0	0
515	7	0	0
516	7	0	0
517	7	1	0.142857
518	7	0	0
519	7	0	0
520	7	1	0.142857
521	7	0	0
522	7	0	0
523	7	0	0
524	7	0	0
525	7	1	0.142857
526	7	0	0
527	7	0	0
528	7	0	0
529	7	0	0
530	7	0	0
531	7	2	0.285714
532	7	0	0
533	7	1	0.142857
534	7	0	0
535	7	0	0
536	7	0	0
537	7	0	0
538	7	0	0
539	7	0	0
540	7	0	0
541	7	0	0
542	7	0	0
543	7	5	0.714286
544	7	0	0
545	7	0	0
546	7	0	0
547	7	0	0
548	7	0	0
549	7	0	0
550	7	0	0
551	7	0	0
552	7	0	0
553	7	0	0
554	7	0	0
555	7	0	0
556	7	0	0
557	7	0	0
558	7	2	0.285714
559	7	0	0
560	7	0	0
561	7	1	0.142857
562	7	0	0
563	7	0	0
564	7	0	0
565	7	0	0
566	7	0	0
567	7	0	0
568	7	3	0.428571
569	7	0	0
570	7	0	0
571	7	0	0
572	7	0	0
573	7	0	0
574	7	0	0
575	7	1	0.142857
576	7	0	0
577	7	1	0.142857
578	7	0	0
579	7	0	0
580	7	0	0
581	7	0	0
582	7	0	0
583	7	1	0.142857
584	7	0	0
585	7	0	0
586	7	0	0
587	7	0	0
588	7	0	0
589	7	0	0
590	7	0	0
591	7	0	0
592	7	0	0
593	7	0	0
594	7	0	0
595	7	0	0
596	7	0	0
597	7	0	0
598	7	0	0
599	7	0	0
600	7	0	0
601	7	0	0
602	7	0	0
603	7	0	0
604	7	0	0
605	7	0	0
606	7	0	0
607	7	0	0
608	7	1	0.142857
609	7	1	0.142857
610	7	2	0.285714
611	7	0	0
612	7	0	0
613	7	0	0
614	7	0	0
615	7	0	0
616	7	0	0
617	7	0	0
618	7	0	0
619	7	0	0
620	7	0	0
621	7	1	0.142857
622	7	0	0
623	7	0	0
624	7	0	0
625	7	0	0
626	7	0	0
627	7	0	0
628	7	0	0
629	7	0	0
630	7	0	0
631	7	0	0
632	7	1	0.142857
633	6	0	0
634	6	0	0
635	6	0	0
636	6	0	0
637	6	0	0
638	6	0	0
639	6	0	0
640	6	0	0
641	6	0	0
642	6	0	0
643	6	0	0
644	6	0	0
645	6	0	0
646	6	0	0
647	6	0	0
648	6	0	0
649	6	0	0
650	6	0	0
651	6	0	0
652	6	1	0.166667
653	6	0	0
654	6	0	0
655	6	2	0.333333
656	6	0	0
657	6	1	0.166667
658	6	0	0
659	6	0	0
660	6	0	0
661	6	0	0
662	6	0	0
663	6	0	0
664	6	0	0
665	6	1	0.166667
666	6	2	0.333333
667	6	0	0
668	6	0	0
669	6	0	0
670	6	0	0
671	6	2	0.333333
672	6	0	0
673	6	0	0
674	6	0	0
675	6	4	0.666667
676	6	0	0
677	6	0	0
678	6	2	0.333333
679	6	0	0
680	6	2	0.333333
681	6	0	0
682	6	0	0
683	6	5	0.833333
684	6	0	0
685	6	2	0.333333
686	6	0	0
687	6	2	0.333333
688	6	1	0.166667
689	6	0	0
690	6	0	0
691	6	0	0
692	6	0	0
693	6	0	0
694	6	0	0
695	6	1	0.166667
696	6	0	0
697	6	0	0
698	6	0	0
699	6	3	0.5
700	6	0	0
701	6	2	0.333333
702	6	0	0
703	6	0	0
704	6	0	0
705	6	0	0
706	6	0	0
707	6	0	0
708	6	0	0
709	6	0	0
710	6	0	0
711	6	0	0
712	6	5	0.833333
713	6	0	0
714	6	4	0.666667
715	6	0	0
716	6	0	0
717	6	0	0
718	6	0	0
719	6	0	0
720	6	0	0
721	6	0	0
722	6	2	0.333333
723	6	0	0
724	6	0	0
725	6	0	0
726	6	0	0
727	6	0	0
728	6	0	0
729	6	0	0
730	6	0	0
731	6	0	0
732	6	2	0.333333
733	6	0	0
734	6	0	0
735	6	5	0.833333
736	6	0	0
737	6	0	0
738	6	0	0
739	6	0	0
740	6	0	0
741	6	0	0
742	6	0	0
743	6	2	0.333333
744	6	0	0
745	6	0	0
746	6	0	0
747	6	0	0
748	6	0	0
749	6	0	0
750	6	0	0
751	6	0	0
752	6	2	0.333333
753	6	5	0.833333
754	6	0	0
755	6	0	0
756	6	0	0
757	6	3	0.5
758	6	0	0
759	6	0	0
760	6	0	0
761	6	0	0
762	6	0	0
763	6	0	0
764	6	0	0
765	6	0	0
766	6	2	0.333333
767	6	0	0
768	6	0	0
769	6	0	0
770	6	0	0
771	6	0	0
772	6	0	0
773	5	0	0
774	5	0	0
775	5	0	0
776	5	0	0
777	5	0	0
778	5	0	0
779	5	0	0
780	5	0	0
781	5	0	0
782	5	0	0
783	5	0	0
784	5	0	0
785	5	0	0
786	5	0	0
787	5	0	0
788	5	0	0
789	5	0	0
790	5	0	0
791	5	0	0
792	5	0	0
793	5	0	0
794	5	0	0
795	5	1	0.2
796	5	0	0
797	5	0	0
798	5	0	0
799	5	0	0
800	5	3	0.6
801	5	0	0
802	5	0	0
803	5	0	0
804	5	1	0.2
805	5	1	0.2
806	5	0	0
807	5	0	0
808	5	0	0
809	5	1	0.2
810	5	0	0
811	5	2	0.4
812	5	0	0
813	5	0	0
814	5	0	0
815	5	0	0
816	5	0	0
817	5	2	0.4
818	5	0	0
819	5	0	0
820	5	0	0
821	5	1	0.2
822	5	0	0
823	5	0	0
824	5	0	0
825	5	0	0
826	5	0	0
827	5	0	0
828	5	0	0
829	5	0	0
830	5	0	0
831	5	0	0
832	5	0	0
833	5	0	0
834	5	0	0
835	5	0	0
836	5	3	0.6
837	5	0	0
838	5	1	0.2
839	5	0	0
840	5	0	0
841	5	0	0
842	5	0	0
843	5	1	0.2
844	5	0	0
845	5	0	0
846	5	0	0
847	5	0	0
848	5	0	0
849	5	0	0
850	5	0	0
851	5	0	0
852	5	0	0
853	5	0	0
854	5	0	0
855	5	0	0
856	5	0	0
857	5	0	0
858	5	0	0
859	5	0	0
860	5	0	0
861	5	0	0
862	5	0	0
863	5	0	0
864	5	0	0
865	5	0	0
866	5	0	0
867	5	0	0
868	5	0	0
869	5	0	0
870	5	0	0
871	5	0	0
872	5	0	0
873	5	0	0
874	5	0	0
875	5	0	0
876	5	0	0
877	5	0	0
878	5	0	0
879	5	0	0
880	5	0	0
881	5	0	0
882	5	0	0
883	5	0	0
884	5	0	0
885	5	0	0
886	5	0	0
887	5	0	0
888	5	0	0
889	5	0	0
890	5	1	0.2
891	5	0	0
892	5	0	0
893	5	1	0.2
894	5	0	0
895	5	0	0
896	5	0	0
897	5	0	0
898	5	0	0
899	5	0	0
900	5	0	0
901	5	0	0
902	5	0	0
903	5	0	0
904	5	0	0
905	5	0	0
906	5	0	0
907	5	0	0
908	5	0	0
909	5	0	0
910	5	0	0
911	5	0	0
912	5	0	0
913	5	0	0
914	5	0	0
915	5	0	0
916	5	0	0
917	5	1	0.2
918	5	0	0
919	5	0	0
920	5	2	0.4
921	5	0	0
922	5	0	0
923	5	0	0
924	5	0	0
925	5	0	0
926	5	0	0
927	5	0	0
928	5	0	0
929	5	0	0
930	5	0	0
931	5	1	0.2
932	5	0	0
933	5	0	0
934	5	0	0
935	5	0	0
936	5	0	0
937	5	0	0
938	5	0	0
939	5	0	0
940	5	0	0
941	5	0	0
942	5	0	0
943	5	0	0
944	5	0	0
945	5	0	0
946	5	2	0.4
947	5	0	0
948	5	0	0
949	5	0	0
950	5	0	0
951	5	2	0.4
952	5	1	0.2
953	5	0	0
954	5	0	0
955	5	0	0
956	5	0	0
957	5	0	0
958	5	0	0
959	5	0	0
960	5	1	0.2
961	5	0	0
962	5	0	0
963	5	0	0
964	5	0	0
